# Supplementary material for: Asymmetric zinc porphyrin-sensitized nanosized TiO2 for efficient visible-light-driven CO2 photoreduction to CO/CH4
Source: Royal Society of Chemistry journal article supplement (doi:10.1039/c5cc03812j), 2015-01-01
Supplement: c5cc03812j1.pdf [file c5cc03812j1.pdf]

## Electronic Supplementary Information

# Asymmetric zinc porphyrin-sensitized nanosized TiO<sub>2</sub> for efficient visible-light-driven CO<sub>2</sub> photoreduction to CO/CH<sub>4</sub>

Kan Li, Li Lin, Tianyou Peng\*, Yingying Guo, Renjie Li and Jing Zhang

*College of Chemistry and Molecular Science, Wuhan University, Wuhan 430072, P. R. China*

*E-mail: typeng@whu.edu.cn*

## EXPERIMENTAL SECTION

### Material preparation

**TiO<sub>2</sub> preparation:** Typically, TiCl<sub>4</sub> (2.85 g, ~15 mmol) was dropped into absolute ethanol (40 g), and then urea (95.0 g) was added with continually stirring. Immediately following the urea dispersed, sodium lactate solution (5.0 mL, ~60%) was added dropwise, and then the mixture was transferred into a Teflon-lined autoclave (total volume of 100 mL), which was sealed and kept at 200°C for 20 h and then cooled to room temperature naturally. The precipitate was centrifugally separated and washed with distilled water and absolute ethanol for several times. The product dried at 70°C was calcined in air for 3 h at 500°C with a heating rate of 2°C min<sup>-1</sup>.

**Porphyrin (H<sub>2</sub>Py) synthesis:** H<sub>2</sub>Py (5-(4-carboxyphenyl)-10,15,20-tri(3-pyridyl)porphyrin) was synthesized in advance as shown in Fig. S1. 3-pyridylcarboxaldehyde (803 mg, 7.5 mmol) and 4-carboxy-benzaldehyde (375 mg, 2.5 mmol) were dissolved in propionic acid (100 mL) and brought to reflux at 140°C, and then pyrrole (0.67 mg, 10 mmol) was added, and continued reflux for another 8 h. The resultant back crude was filtered off after adding distilled water (100 mL) under vacuum, then purified by silica gel column chromatography using dichloromethane/methanol (90:10, v/v) as solvent. The dark purple solid was then purified by re-crystallization from a dichloromethane/hexane mixture to obtain H<sub>2</sub>Py (Yield: 107 mg, 6.5%). TOF-MS (m/z) calcd. for C<sub>42</sub>H<sub>27</sub>N<sub>7</sub>O<sub>2</sub> [M+H]<sup>+</sup> 661.71, found 662.58. <sup>1</sup>H NMR (DMSO-d<sub>6</sub>, 300 MHz): δ=13.2 (1H), 9.40 (2H), 9.06-9.08 (2H), 8.80-8.90 (7H), 8.60-8.70 (3H), 8.34-8.49 (5H), 7.90-8.04 (5H), -2.50 (2H).

**Zinc (II) porphyrin (ZnPy) synthesis:** ZnPy was prepared by refluxing H<sub>2</sub>Py (50 mg, 0.076 mmol) and Zn(OAc)<sub>2</sub>·2H<sub>2</sub>O (67 mg, 0.304 mmol) in DMF (10 mL) for 5 h at 100°C as shown in Fig. S1. The solvent was removed after 20 mL distilled water was added to the reaction mixture. The precipitate was centrifuged, washed three times with distilled water and dried overnight

under vacuum to obtain ZnPy. (Yield: 44 mg, 81.5%). TOF-MS (m/z) calcd. for  $\text{ZnC}_{42}\text{H}_{25}\text{N}_7\text{O}_2$   $[\text{M}+\text{H}]^+$  723.14, found 723.26.  $^1\text{H}$  NMR (DMSO- $d_6$ , 300 MHz):  $\delta=9.33$  (2H), 9.00-9.02 (2H), 8.81-8.85 (7H), 8.55-8.65 (3H), 8.30-8.40 (5H), 7.85-8.00 (5H) (H in  $-\text{COOH}$  is not been found).

**ZnPy-TiO<sub>2</sub> preparation:** ZnPy-sensitized TiO<sub>2</sub> (ZnPy-TiO<sub>2</sub>) was prepared by an impregnation method. Typically, the above TiO<sub>2</sub> product (0.20 g) was mixed with ZnPy solution (20 mL, varied with the dye-loading level) under stirring for 12 h, and then centrifugally separated and dried in vacuum at 70°C overnight to obtain ZnPy-TiO<sub>2</sub>. The dye-loaded amount was calculated based on the absorbance difference of the ZnPy solution before/after the dye sensitization process.

## Material characterization

X-ray powder diffraction (XRD) pattern was obtained by Miniflex 600 X-ray diffractometer with Cu K $\alpha$  irradiation ( $\lambda = 0.154$  nm) at 40 kV and 15 mA and a scan rate of 4° min<sup>-1</sup> in the range of  $10^\circ \leq 2\theta \leq 50^\circ$ . Raman spectrum was measured on a RM-1000 Renishaw Confocal Raman Microspectroscopy with scanning from 100 cm<sup>-1</sup> to 1200 cm<sup>-1</sup> and 10 s of CCD exposure time. Nitrogen adsorption-desorption isotherm at 77 K was measured on a Micrometrics ASAP 2010 system after sample were degassed at 120°C. The morphology was observed with Zeiss-Sigma field emission scanning electron microscope (FESEM), and high-resolution transmission electron microscopy (HRTEM) observation was conducted on a LaB6 JEM-2100(HR) electron microscope (JEOL Ltd.) working at 200 kV.

$^1\text{H}$  NMR spectra were recorded on a 300 MHz Bruker DPX 300 spectrometer in DMSO- $d_6$ . MALDI-TOF-MS spectra were taken on a Bruker BIFLEX III ultrahigh resolution Fourier transform ion cyclotron resonance (FT-ICR) mass spectrometer with alpha-cyano-4-hydroxycinnamic acid as a matrix. UV-Vis absorption spectra were recorded on a TU-1810 spectrophotometer with scanning from 250 to 900 nm. Fluorescence spectra were recorded on a K2 ISIS spectrometer. Fourier transform infrared (FTIR) spectrum was recorded by using a Nicolet iS10 spectrometer (Thermo Electron).

UV-vis diffuse reflectance absorption spectra (DRS) were obtained by a Shimadzu UV-3600 spectrophotometer equipped with an integrating sphere with BaSO<sub>4</sub> as the reference sample. Photoluminescence (PL) spectrum was determined by using a Hitachi F-4500 fluorescence spectrophotometer. Time-resolved photoluminescence (PL) spectra were recorded by a Multifunction Steady State and Transient State Fluorescence Spectrometer (FES920, Edinburgh Instruments) at 398 nm with 375 nm excitation.

*In situ* DRIFTS IR spectra were recorded on a Nicolet iS50 spectrometer (Thermo Electron)

equipped with a liquid nitrogen cooled HgCdTe (MCT/A) detector. The spectra in absorbance units, and acquired with a resolution of  $4\text{ cm}^{-1}$  by using 256 scans. Typically, 40 mg catalyst was uniformly dispersed onto the DRIFTS accessory, which was then thoroughly vacuum-treated to remove air completely, and then pure  $\text{CO}_2$  (99.999%) gas and  $\text{H}_2\text{O}$  vapor were introduced into the reactor until 1 atm and then maintained for 20 min before collecting the IR spectra.

### **Photocatalytic and photoelectrochemical property measurement**

Photocatalytic  $\text{CO}_2$  reduction was carried out in a home-made gas-closed circulation system operated under a 300 W Xe-lamp irradiation. Typically, catalyst (60 mg) was uniformly dispersed onto the watch-glass with an area of  $\sim 28\text{ cm}^2$ , which was then put in the reaction cell (Pyrex glass) with a total volume of 500 mL. Prior to the light irradiation, the above system was thoroughly vacuum-treated to completely remove air.  $\text{CO}_2$  and  $\text{H}_2\text{O}$  vapor were produced from the reaction of  $\text{NaHCO}_3$  (1.00 g, introduced into the reactor before being sealed) and  $\text{H}_2\text{SO}_4$  solution (5.0 mL, 4.0 M, introduced into the reactor *via* a syringe after the vacuum treatment). During irradiation, 2 mL gas was taken from the reactor at regular intervals (1 h) for the gas concentration analysis using a gas chromatograph (SP-7820, TDX-01 column, Rainbow chemical instrument Co. Ltd., China) equipped with a flame ionized detector (FID) and methanizer. The produced gases were calibrated with a standard gas mixture and their identity determined using the retention time.

For the stability test of catalyst (1.0% ZnPy- $\text{TiO}_2$ ), the watch-glass with irradiated catalyst was moved out of the reaction cell after each run, and then dried in vacuum at  $60^\circ\text{C}$  for 3 h to remove the physical adsorbed  $\text{H}_2\text{O}$  and  $\text{CO}_2$ . The watch-glass containing the recycled catalyst was then used the subsequent  $\text{CO}_2$  photoreduction process as mentioned above.

For obtaining the photocurrent and electrochemical impedance spectra (EIS), working electrodes were prepared as follows: sample (0.2 g) was ground with ethanol (0.8 g), the resultant slurry was then coated onto a FTO glass by the doctor blade method. These electrodes were dried and calcined at  $500^\circ\text{C}$  for 1 h. All electrodes tested had a similar film thickness. Photocurrents were measured using an electrochemical analyzer (CHI 618C Instruments) in a standard three electrode system by using the prepared film as the working electrodes (an effective area of  $1\text{ cm}^2$ ), a Pt flake as the counter electrode, and Ag/AgCl as the reference electrode. Bias potential applied on the working electrode was 0.5 V. A 300 W Xe-lamp (CHF-XM 500, Beijing Trusttech Co. Ltd., China) served as a light source to irradiate the working electrode from the back side. A 1.0 M  $\text{Na}_2\text{SO}_4$  solution was used as the electrolyte.

## FIGURES AND TABLES

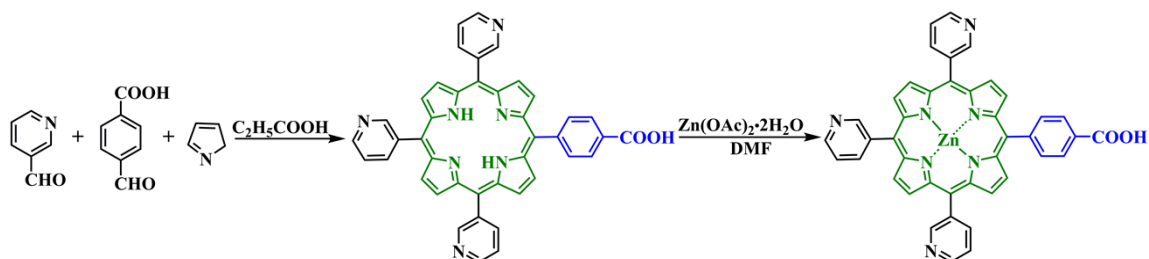

**Fig. S1** Synthetic route of  $H_2Py$  and  $ZnPy$ .

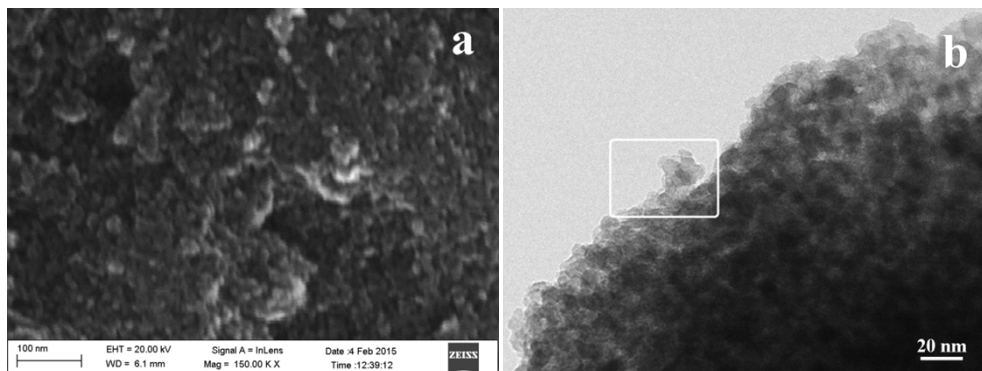

**Fig. S2** FESEM (a) and TEM (b) images of the synthesized  $TiO_2$  nanoparticles.

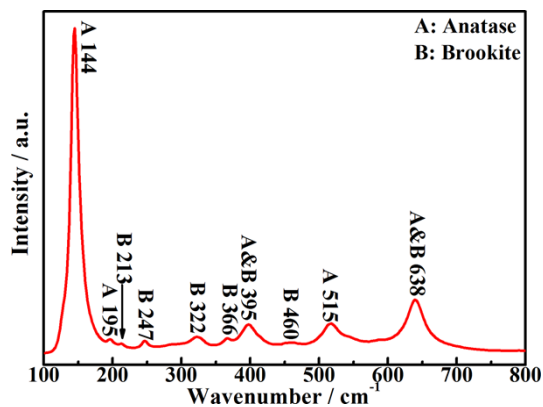

**Fig. S3** Raman spectrum of the synthesized  $TiO_2$  nanoparticles.

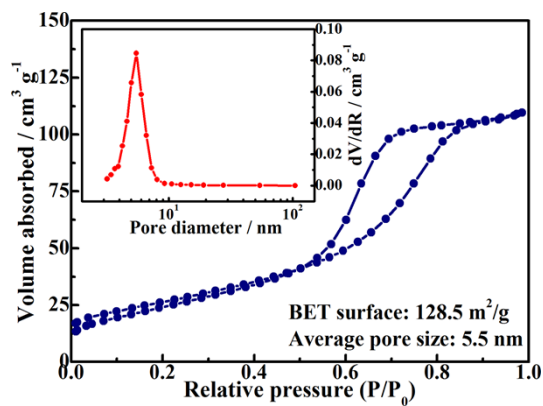

**Fig. S4**  $N_2$  adsorption-desorption isotherm and Barrett-Joyner-Halenda (BJH) pore size distribution plot (inset) of the synthesized  $TiO_2$  nanoparticles.

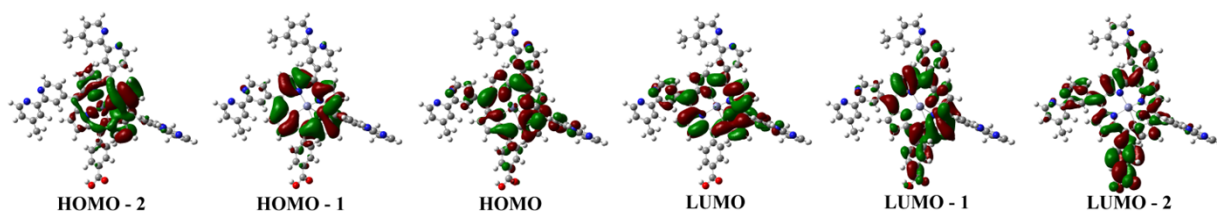

**Fig. S5** The frontier orbitals of ZnPy obtained from the DFT calculation, full optimized at B3LYP/6-31g level.

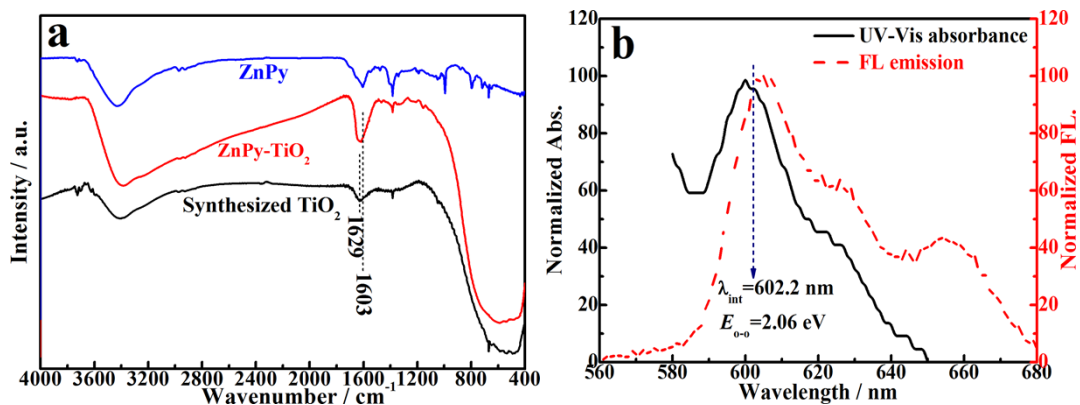

**Fig. S6** (a) FTIR spectra of ZnPy, TiO<sub>2</sub> and ZnPy-TiO<sub>2</sub>; (b) the normalized UV-Vis absorption and fluorescence emission spectra of ZnPy.

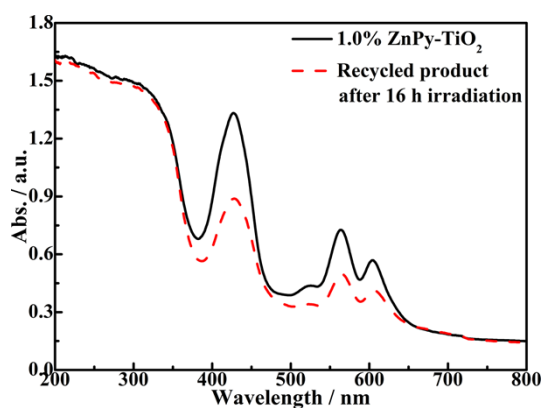

**Fig. S7** UV-vis diffuse reflection absorption spectra (DRS) of 1.0% ZnPy-TiO<sub>2</sub> and its recycled product after 16 h light irradiation.

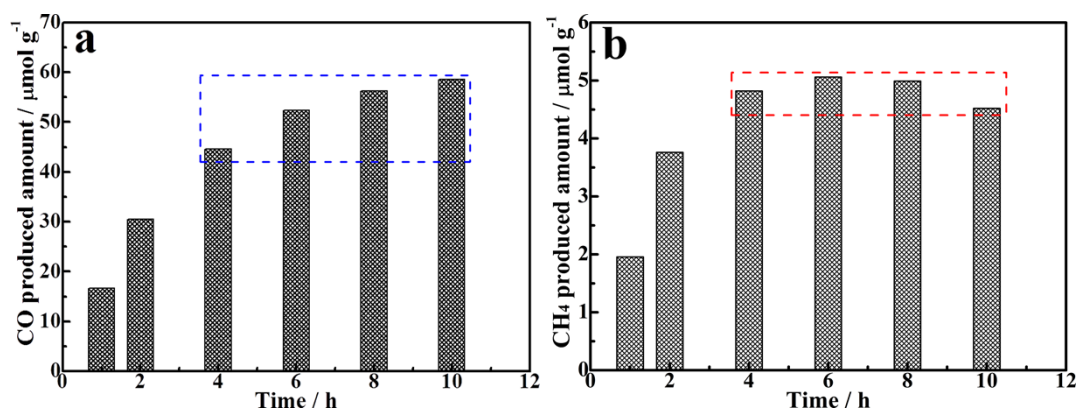

**Fig. S8** Typical CO (a) and CH<sub>4</sub> (b) produced amount over 1.0% ZnPy-TiO<sub>2</sub> for 1, 2, 4, 6, 8, and 10 h continuous irradiation under  $\lambda \geq 420$  nm light.

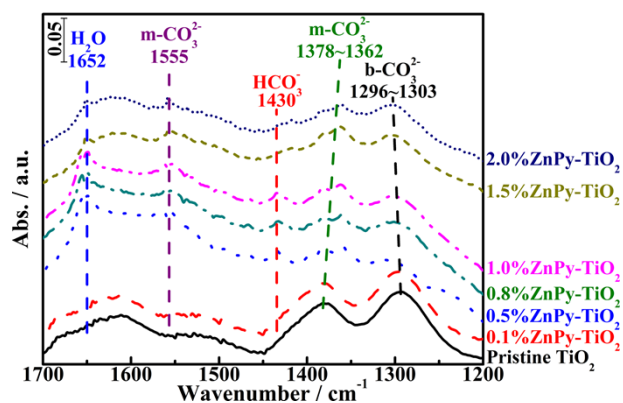

**Fig. S9** *In situ* DRIFTS IR spectra of CO<sub>2</sub> interactions with the synthesized TiO<sub>2</sub> and 1.0% ZnPy-TiO<sub>2</sub>.

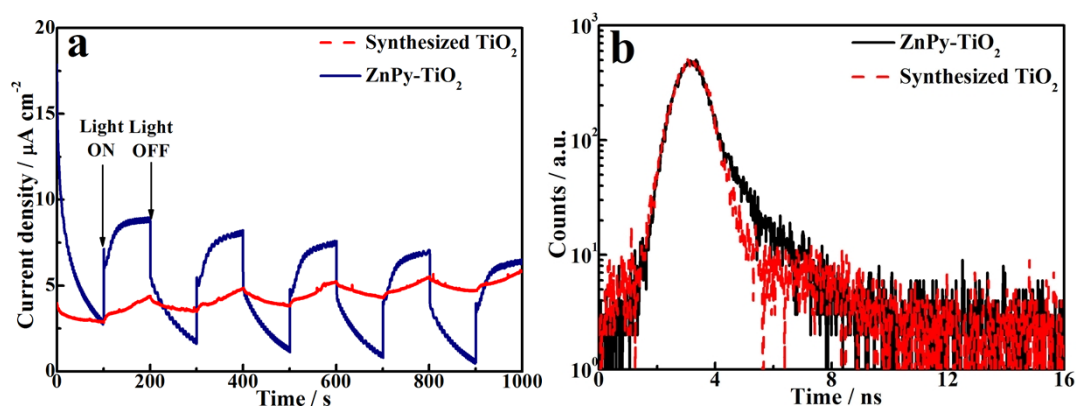

**Fig. S10** Photocurrent-time curves (a) and time-resolved PL spectra (b) of the synthesized TiO<sub>2</sub> and 1.0% ZnPy-TiO<sub>2</sub>.

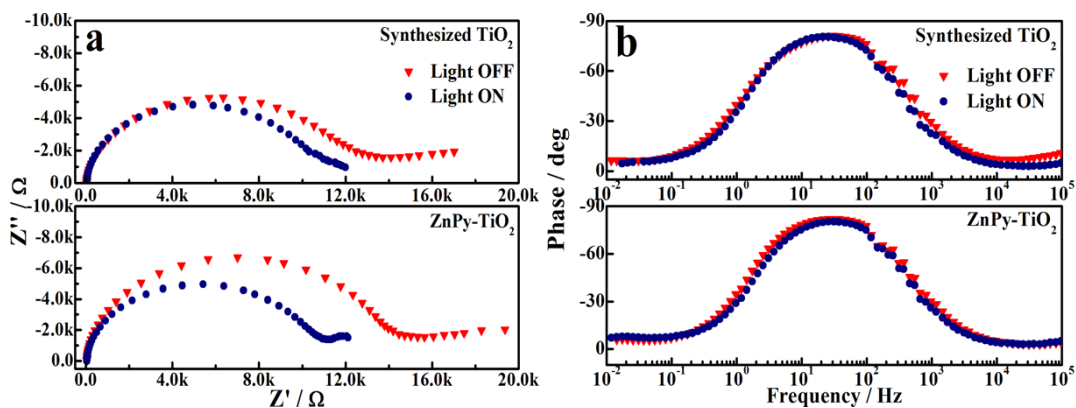

**Fig. S11** Electrochemical impedance spectra (EIS) spectra of the synthesized TiO<sub>2</sub> and 1.0% ZnPy-TiO<sub>2</sub>. Nyquist (a) and Bode (b) plots.

**Table S1** Spectral, electrochemical and DFT calculated data of ZnPy.

| Dye  | $\lambda_{\max}$<br>/ nm | $\epsilon$<br>/ *10 <sup>5</sup> L mol <sup>-1</sup> cm <sup>-1</sup> | $E_{\text{ox}}$<br>/ V(vs. SCE) | $E_{\text{red}}$<br>/ V(vs. SCE) | $E_{0-0}$<br>/ eV | $E^*$<br>/ V      | HOMO <sup>c</sup><br>/ V             | LUMO <sup>c</sup><br>/ V               |
|------|--------------------------|-----------------------------------------------------------------------|---------------------------------|----------------------------------|-------------------|-------------------|--------------------------------------|----------------------------------------|
| ZnPy | 420                      | 2.00                                                                  | 0.95 <sup>a</sup>               | -0.99 <sup>a</sup>               | 2.06              | 1.11 <sup>a</sup> | 1.16 <sup>a</sup> /0.72 <sup>b</sup> | -0.90 <sup>a</sup> /-1.63 <sup>b</sup> |

<sup>a</sup>Data are obtained from the electrochemical measurements.

<sup>b</sup>Data are obtained from the DFT calculation.

<sup>c</sup>HOMO and LUMO states are vs. NHE.

**Table S2** CO<sub>2</sub> photoreduction activity and the TCEN value of ZnPy-TiO<sub>2</sub>.

| Catalysts                  | Dye-sensitized level<br><sup>a</sup> / % | CO produced rate /<br>μmol g <sup>-1</sup> h <sup>-1</sup> | CH <sub>4</sub> produced rate <sup>b</sup> /<br>μmol g <sup>-1</sup> h <sup>-1</sup> | TCEN /<br>μmol g <sup>-1</sup> h <sup>-1</sup> |
|----------------------------|------------------------------------------|------------------------------------------------------------|--------------------------------------------------------------------------------------|------------------------------------------------|
| Pristine TiO <sub>2</sub>  | 0                                        | 0                                                          | 0                                                                                    | 0                                              |
| 0.1% ZnPy-TiO <sub>2</sub> | 0.08                                     | 1.07                                                       | 0                                                                                    | 2.15                                           |
| 0.5% ZnPy-TiO <sub>2</sub> | 0.42                                     | 3.55                                                       | Trace                                                                                | 7.09                                           |
| 0.8% ZnPy-TiO <sub>2</sub> | 0.70                                     | 6.89                                                       | 0.87                                                                                 | 20.70                                          |
| 1.0% ZnPy-TiO <sub>2</sub> | 0.86                                     | 8.07                                                       | 1.01                                                                                 | 24.17                                          |
| 1.5% ZnPy-TiO <sub>2</sub> | 1.23                                     | 7.74                                                       | 0.48                                                                                 | 19.28                                          |
| 2.0% ZnPy-TiO <sub>2</sub> | 1.51                                     | 5.96                                                       | Trace                                                                                | 11.92                                          |

<sup>a</sup> Dye-sensitized level is determined by the concentration difference of the ZnPy solution before/after sensitization.

<sup>b</sup> Trace means that CH<sub>4</sub> produced rate cannot measure quantitatively.

**Table S3** Comparison with other photocatalytic systems

| Catalyst                                           | Light source                | Reaction condition                                 | Yield (Product)<br>/μmol g <sup>-1</sup> h <sup>-1</sup>        | TCEN<br>/μmol g <sup>-1</sup> h <sup>-1</sup> | Ref.      |
|----------------------------------------------------|-----------------------------|----------------------------------------------------|-----------------------------------------------------------------|-----------------------------------------------|-----------|
| TiO <sub>2</sub>                                   | 500 W tungsten-halogen lamp | 0.1 M NaOH solution with bubbled CO <sub>2</sub>   | 32.1/10.58/1.67 (HCOOH/CO/CH <sub>4</sub> )                     | 98.7                                          | 1         |
| 1.0% ZnPc-TiO <sub>2</sub>                         | 500 W tungsten-halogen lamp | 0.1 M NaOH solution with bubbled CO <sub>2</sub>   | 87.9/15.4/7.65 (HCOOH/CO/CH <sub>4</sub> )                      | 267.9                                         |           |
| u-g-C <sub>3</sub> N <sub>4</sub>                  | 300 W Xe-lamp, λ>420 nm     | 1.0 M NaOH solution with saturated CO <sub>2</sub> | 6.28/4.51 (CH <sub>3</sub> OH/C <sub>2</sub> H <sub>5</sub> OH) | 91.8                                          | 2         |
| Lamellar BiVO <sub>4</sub>                         | 300 W Xe-lamp               | 1.0 M NaOH solution with saturated CO <sub>2</sub> | 5.52 (CH <sub>3</sub> OH)                                       | 33.12                                         | 3         |
|                                                    | 300 W Xe-lamp, λ>420 nm     | 1.0 M NaOH solution with saturated CO <sub>2</sub> | 3.76 (CH <sub>3</sub> OH)                                       | 22.56                                         |           |
| 1.0% Au-NaTaO <sub>3</sub>                         | 200 W Hg-Xe lamp            | CO <sub>2</sub> /H <sub>2</sub> O vapor            | 0.17/0.04 (CO/CH <sub>4</sub> )                                 | 0.634                                         | 4         |
| TiO <sub>2</sub> with exposed {001}/{101} facets   | 300 W Xe-lamp               | CO <sub>2</sub> /H <sub>2</sub> O vapor            | 1.35 (CH <sub>4</sub> )                                         | 10.8                                          | 5         |
| 1.0% Pt-TiO <sub>2</sub> with exposed {001} facets | 300 W Xe-lamp               | CO <sub>2</sub> /H <sub>2</sub> O vapor            | 2.60 (CH <sub>4</sub> )                                         | 20.8                                          | 6         |
| 1.0% ZnPy-TiO <sub>2</sub>                         | 300 W Xe-lamp, λ>420 nm     | CO <sub>2</sub> /H <sub>2</sub> O vapor            | 8.07/1.01 (CO/CH <sub>4</sub> )                                 | 24.17                                         | This work |

**Table S4** Photoelectrochemical parameters derived from EIS and time-resolved PL spectra.

| Catalyst                  | Irradiation condition | R <sub>s</sub><br>/ Ω cm <sup>2</sup> | R <sub>1</sub><br>/ Ω cm <sup>2</sup> | R <sub>2</sub><br>/ kΩ cm <sup>2</sup> | τ <sub>n</sub> <sup>a</sup><br>/ ms | τ <sub>n</sub> ' <sup>b</sup><br>/ ns |
|---------------------------|-----------------------|---------------------------------------|---------------------------------------|----------------------------------------|-------------------------------------|---------------------------------------|
| Pristine TiO <sub>2</sub> | OFF                   | 21.4                                  | 6.5                                   | 13.5                                   | 5.05                                | 1.55                                  |
|                           | ON                    | 32.7                                  | 2.0                                   | 11.1                                   | 6.19                                |                                       |
| ZnPy-TiO <sub>2</sub>     | OFF                   | 32.2                                  | 7.1                                   | 14.8                                   | 6.19                                | 7.78                                  |
|                           | ON                    | 48.5                                  | 2.3                                   | 11.4                                   | 6.19                                |                                       |

<sup>a</sup> τ<sub>n</sub> is calculated from the EIS Bode plot.

<sup>b</sup> τ<sub>n</sub>' is the photoinduced electron lifetime calculated from the time-resolved PL spectra.

## RESULTS AND DISCUSSIONS

### Total consumed electron number (TCEN) calculation

In the present gas phase CO<sub>2</sub> photoreduction system, the reaction of CO<sub>2</sub> conversion to CH<sub>4</sub> involves 8 electrons transfer process, while the reaction for the CO production relates to 2 electrons transfer process as follows:

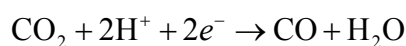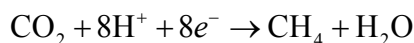

Fig. 3a shows the effects of the ZnPy-loading level on the photocatalytic CO/CH<sub>4</sub> production activities during the initial 2 h light irradiation, and the corresponding overall photoactivity for the CO/CH<sub>4</sub> generation over ZnPy-TiO<sub>2</sub> can be estimated with total consumed electron number (TCEN), which is calculated with Eqn. (1).<sup>4,7,8</sup>

$$\text{TCEN} = \frac{(2c_{\text{CO}} + 8c_{\text{CH}_4}) \times V_{\text{reactor}}}{m_{\text{cat.}} \times t_{\text{irr.}}} \quad (1)$$

Where, TCEN is the total consumed electron number for the CO/CH<sub>4</sub> generation.  $V_{\text{reactor}}$  is the reactor volume (0.5 L).  $t_{\text{irr.}}$  is the irradiation time.  $m_{\text{cat.}}$  is the catalyst dosage (60 mg).  $c_{\text{CO}}$  and  $c_{\text{CH}_4}$  are the produced CO and CH<sub>4</sub> concentration, respectively.

### ZnPy energy level measurement

The thermodynamic practicability is an important aspect in a dye-sensitized semiconductor, the electrochemical behaviors of the synthesized ZnPy was investigated by using cyclic voltammetry (CV), and the corresponding results and calculated HOMO ( $E_{\text{HOMO}} = -(E_{\text{ox}} + 4.71)$  eV, and then converted to vs. NHE as shown in Table S1) and LUMO ( $E^* = (E_{\text{ox}} - E_{\text{o-o}})$  eV, and also converted to vs. NHE) levels of ZnPy are shown in Table S1 according to the previous method reported in literatures.<sup>9,10</sup> Among which,  $E_{\text{ox}}$  is obtained from the CV curve; and  $E_{\text{o-o}}$  is obtained from the intersection of normalized absorption and emission spectra of the ZnPy dye as shown in Fig. S6b. As can be seen from Table S1, the  $E^*$  value of ZnPy is sufficiently negative as compared with the CB of TiO<sub>2</sub> (-0.53 V vs. NHE).<sup>9,10</sup> Therefore, the electrons of the excited ZnPy molecules can be injected into the CB of TiO<sub>2</sub>, which then resulting in the CO<sub>2</sub> photoreduction to carbon fuels.

### Comparison with the other CO<sub>2</sub> photocatalytic systems

Generally, CO<sub>2</sub> photoreduction over catalyst can be conducted in liquid or gas phase



photoreaction system. In liquid phase system, the catalyst can be dispersed uniformly and well attached with those dissolved CO<sub>2</sub> species, such as carbonate (CO<sub>3</sub><sup>2-</sup>), bicarbonate (HCO<sub>3</sub><sup>-</sup>) and carbon dioxide (CO<sub>2</sub> and H<sub>2</sub>CO<sub>3</sub>), and thus the photocatalytic activity of CO<sub>2</sub> conversion is usually higher than that of the gas phase system as shown in Table. S3. However, it is difficult to determine the initial reactants due to the ionization equilibrium among CO<sub>3</sub><sup>2-</sup>, HCO<sub>3</sub><sup>-</sup>, CO<sub>2</sub> and H<sub>2</sub>CO<sub>3</sub> in the liquid phase system, and thus gas phase CO<sub>2</sub> photoreduction system has increasingly got recognition lately. Although the overall photoactivity (TCEN value) is much lower than the similar dye-sensitized catalyst in liquid phase system, the present TCEN value is relatively high among the gas phase system reported previously as shown in Table S3.<sup>1-6</sup>

### **Photoelectrochemical properties of ZnPy-TiO<sub>2</sub>**

To better understand of the charge transfer and electron injection, the photocurrent responses, the time-resolved PL spectra and electrochemical impedance spectra (EIS) spectra are taken out on the pristine TiO<sub>2</sub> and 1.0% ZnPy-TiO<sub>2</sub> films. As shown in Fig. S10a, the photocurrent response of 1.0% ZnPy-TiO<sub>2</sub> is much stronger than the pristine one, which can be ascribed to the fast charge transfer of ZnPy to TiO<sub>2</sub> and the efficient visible light absorption of ZnPy. Moreover, the time-resolved PL spectra also support the charge transfer from ZnPy to TiO<sub>2</sub> Fig. S10b. Under 375 nm laser exciter, ZnPy and TiO<sub>2</sub> are both excited, and the lifetime ( $\tau_n$ ) of ZnPy-TiO<sub>2</sub> is 7.78 ns, much longer than that (1.55 ns) of the pristine one as shown in Table S4. This prolonged lifetime is due to the ZnPy excitation and the consequent charge transfer from ZnPy to TiO<sub>2</sub>.<sup>9,10</sup>

Typically, the Nyquist diagrams of the EIS shown in Fig. S11a present two semicircles. The semicircle in high frequency region can be ascribed to the charge transfer resistance ( $R_1$ ) at the redox electrolyte/Pt counter electrode interfaces; and the semicircle in middle frequency region is related to the resistance ( $R_2$ ) of the accumulation/transport of the injected electrons within TiO<sub>2</sub> film and the charge transfer across either the TiO<sub>2</sub>/redox electrolyte or the FTO/TiO<sub>2</sub> interfaces;  $R_s$  (the initial point of Nyquist plot) represents the serial resistance which is determined by the sheet resistance between TiO<sub>2</sub> substrate and the conductive layers of FTO glass.<sup>11-13</sup> The decreased  $R_2$  values when the irradiation is switched on can be related to the photoinduced electrons partly transferred to the surface, which can easily transport to the electrolyte. As can be seen from Table S4, the  $R_2$  value of 1.0% ZnPy-TiO<sub>2</sub> and the pristine TiO<sub>2</sub> films decreases 23.0% and 17.8% when the irradiation is switched on, respectively. It also confirms the more frequent charge transfer from ZnPy to TiO<sub>2</sub> in the ZnPy-TiO<sub>2</sub> film, and well matched with the above photoactivity and its assumed mechanism. Moreover, the lifetime ( $\tau_n$ ) of photoinduced electrons

can be determined by the position of the low frequency peak (less than 100 Hz) in the Bode plots (Fig. S11b) through the equation that  $\tau_n = 1/(2\pi f)$ , where  $f$  means the frequency of superimposed AC voltage. The lifetimes of both 1.0% ZnPy-TiO<sub>2</sub> and the pristine TiO<sub>2</sub> films can be basically maintained before/after the irradiation switched on. Hence, it can be concluded that the electron reactions of CO<sub>2</sub> photoreduction is on the active sites of TiO<sub>2</sub> surfaces. As a summary, the charge transfer of ZnPy-TiO<sub>2</sub> is that the excited ZnPy molecules inject electrons to TiO<sub>2</sub> and then convert CO<sub>2</sub> over the TiO<sub>2</sub> surfaces.

## REFERENCES

- 1 Z. H. Zhao, J. M. Fan and Z. Z. Wang, *J. Clean. Prod.*, 2007, **15**, 1894.
- 2 J. Mao, T. Y. Peng, X. H. Zhang, K. Li, L. Q. Ye and L. Zan, *Catal. Sci. Technol.*, 2013, **3**, 1253.
- 3 J. Mao, T. Y. Peng, X. H. Zhang, K. Li and L. Zan, *Catal. Commun.*, 2012, **28**, 38.
- 4 H. Zhou, P. Li, J. J. Guo, R. Y. Yan, T. X. Fan, D. Zhang and J. H. Ye, *Nanoscale*, 2015, **7**, 113.
- 5 J. G. Yu, J. X. Low, W. Xiao, P. Zhou and M. Jaroniec, *J. Am. Chem. Soc.*, 2014, **136**, 8839.
- 6 J. Mao, L. Q. Ye, K. Li, X. H. Zhang, J. Y. Liu, T. Y. Peng and L. Zan, *Appl. Catal. B-Environ.*, 2014, **114**, 855.
- 7 J. Mao, K. Li and T. Y. Peng, *Catal. Sci. Technol.*, 2013, **3**, 2481.
- 8 E. V. Kondratenko, G. Mul, J. Baltrusaitis, G. O. Larrazabal and J. Perez-Ramirez, *Energy Environ. Sci.*, 2013, **6**, 3112.
- 9 X. H. Zhang, L. J. Yu, R. J. Li, T. Y. Peng and X. G. Li, *Catal. Sci. Technol.*, 2014, **4**, 3251.
- 10 X. H. Zhang, L. J. Yu, C. S. Zhuang, T. Y. Peng, R. J. Li and X. G. Li, *RSC Adv.*, 2013, **3**, 14363.
- 11 J. L. Xu, K. Li, W. Y. Shi, R. J. Li and T. Y. Peng, *J. Power Sources*, 2014, **260**, 233.
- 12 L. J. Yu, W. Y. Shi, L. Lin, Y. Y. Guo, R. J. Li and T. Y. Peng, *Dyes Pigments*, 2015, **114**, 231.
- 13 L. J. Yu, W. Y. Shi, L. Lin, Y. W. Liu, R. J. Li, T. Y. Peng and X. G. Li, *Dalton T.*, 2014, **43**, 8421.
